# Supplementary figures and images for: TP53 drives invasion through expression of its Δ133p53β variant
Source: eLife journal article supplement (doi:10.7554/elife.14734), 2016-09-15

Figure 4-figure supplement 1

A

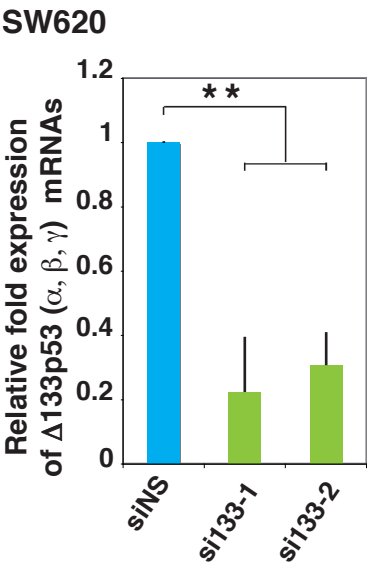

B

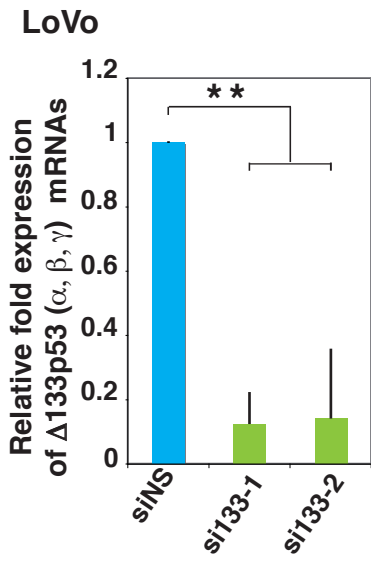

C

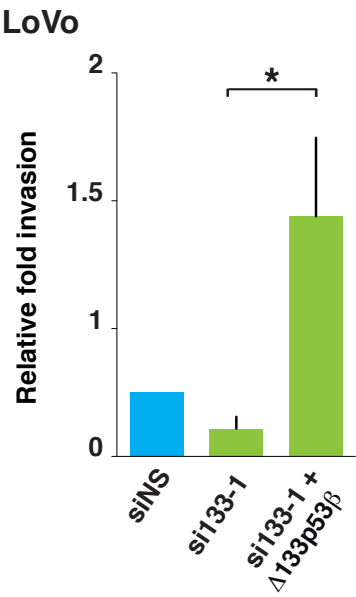

D

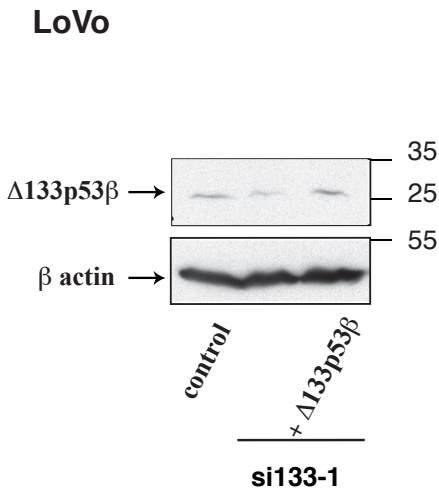

Supplement: supp [file elife-14734-supp-v1.zip]

Figure 1-figure supplement 1

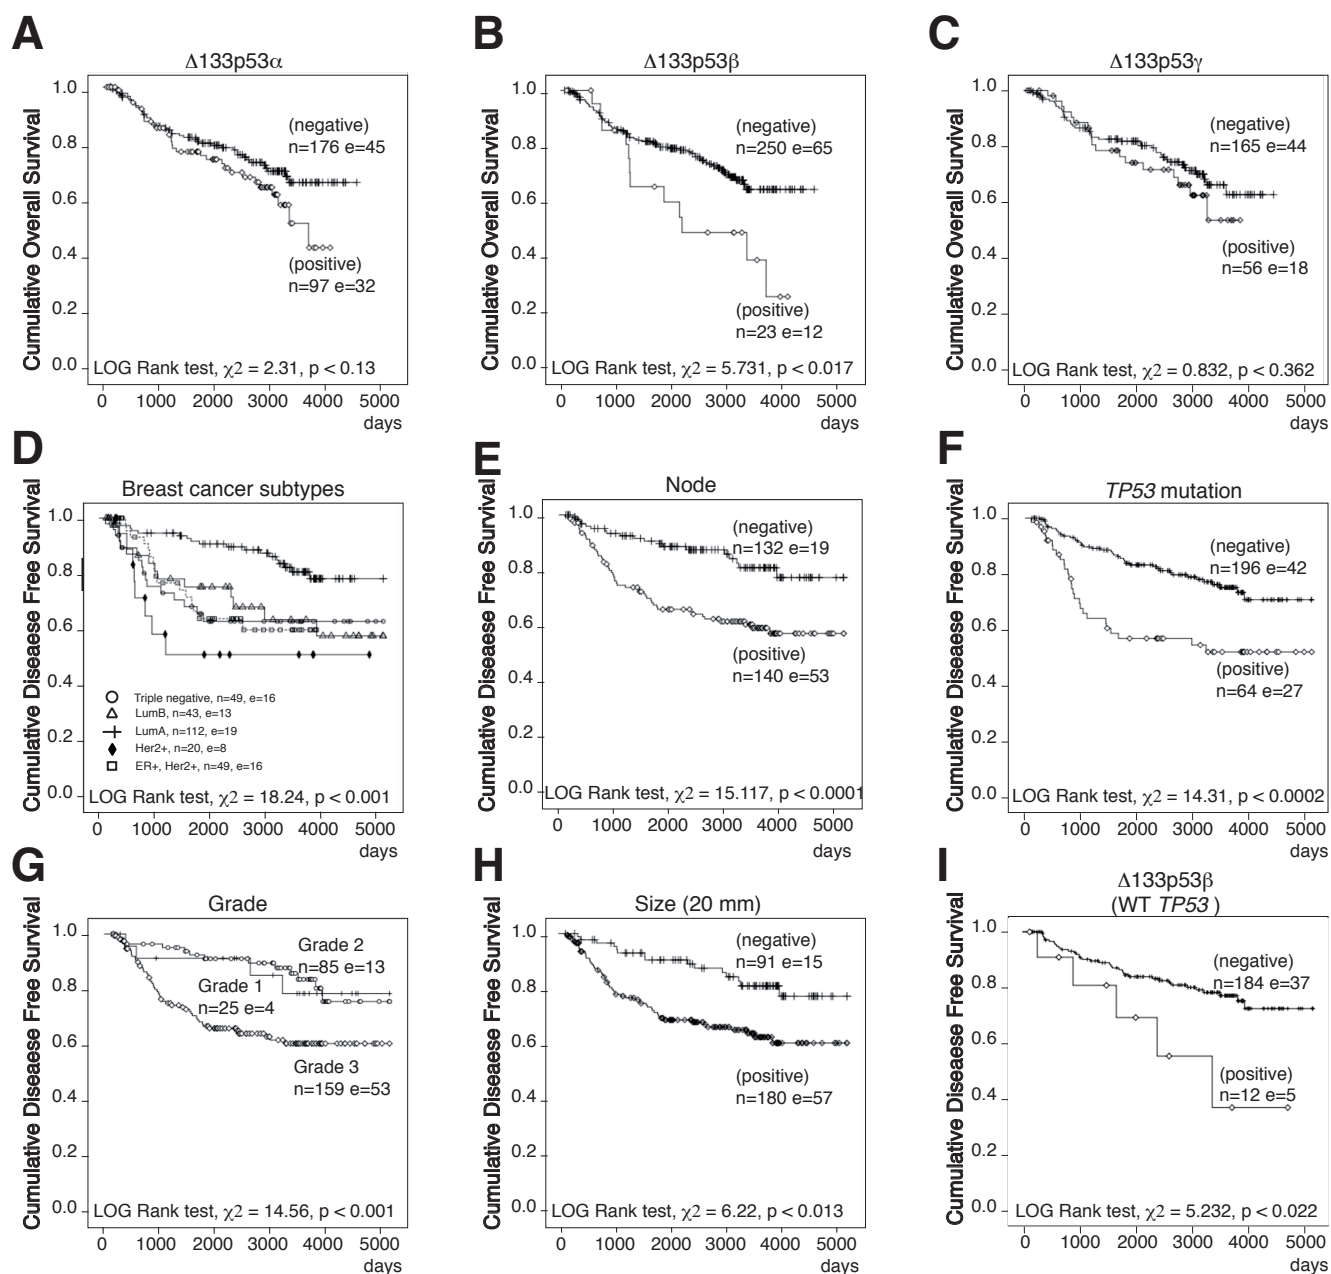

Supplement: supp [file elife-14734-supp-v1.zip]

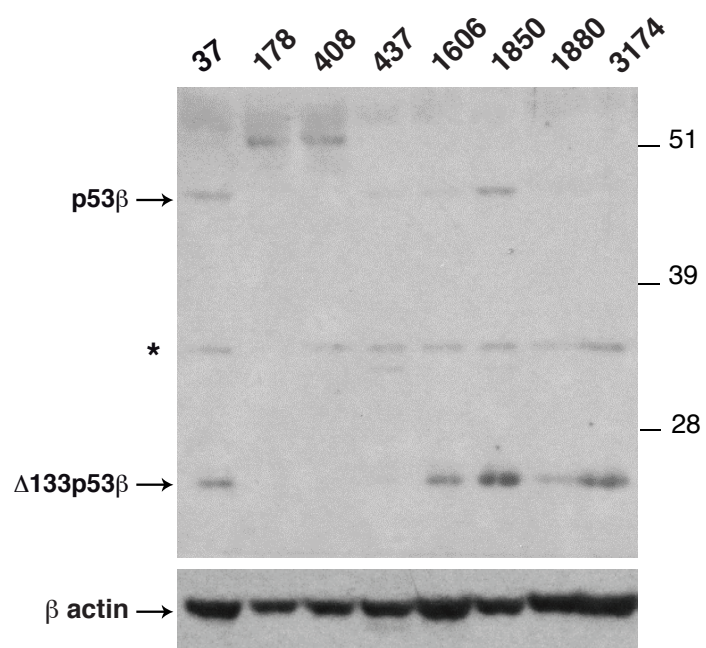

Supplement: supp [file elife-14734-supp-v1.zip]

Figure 3-figure supplement 1

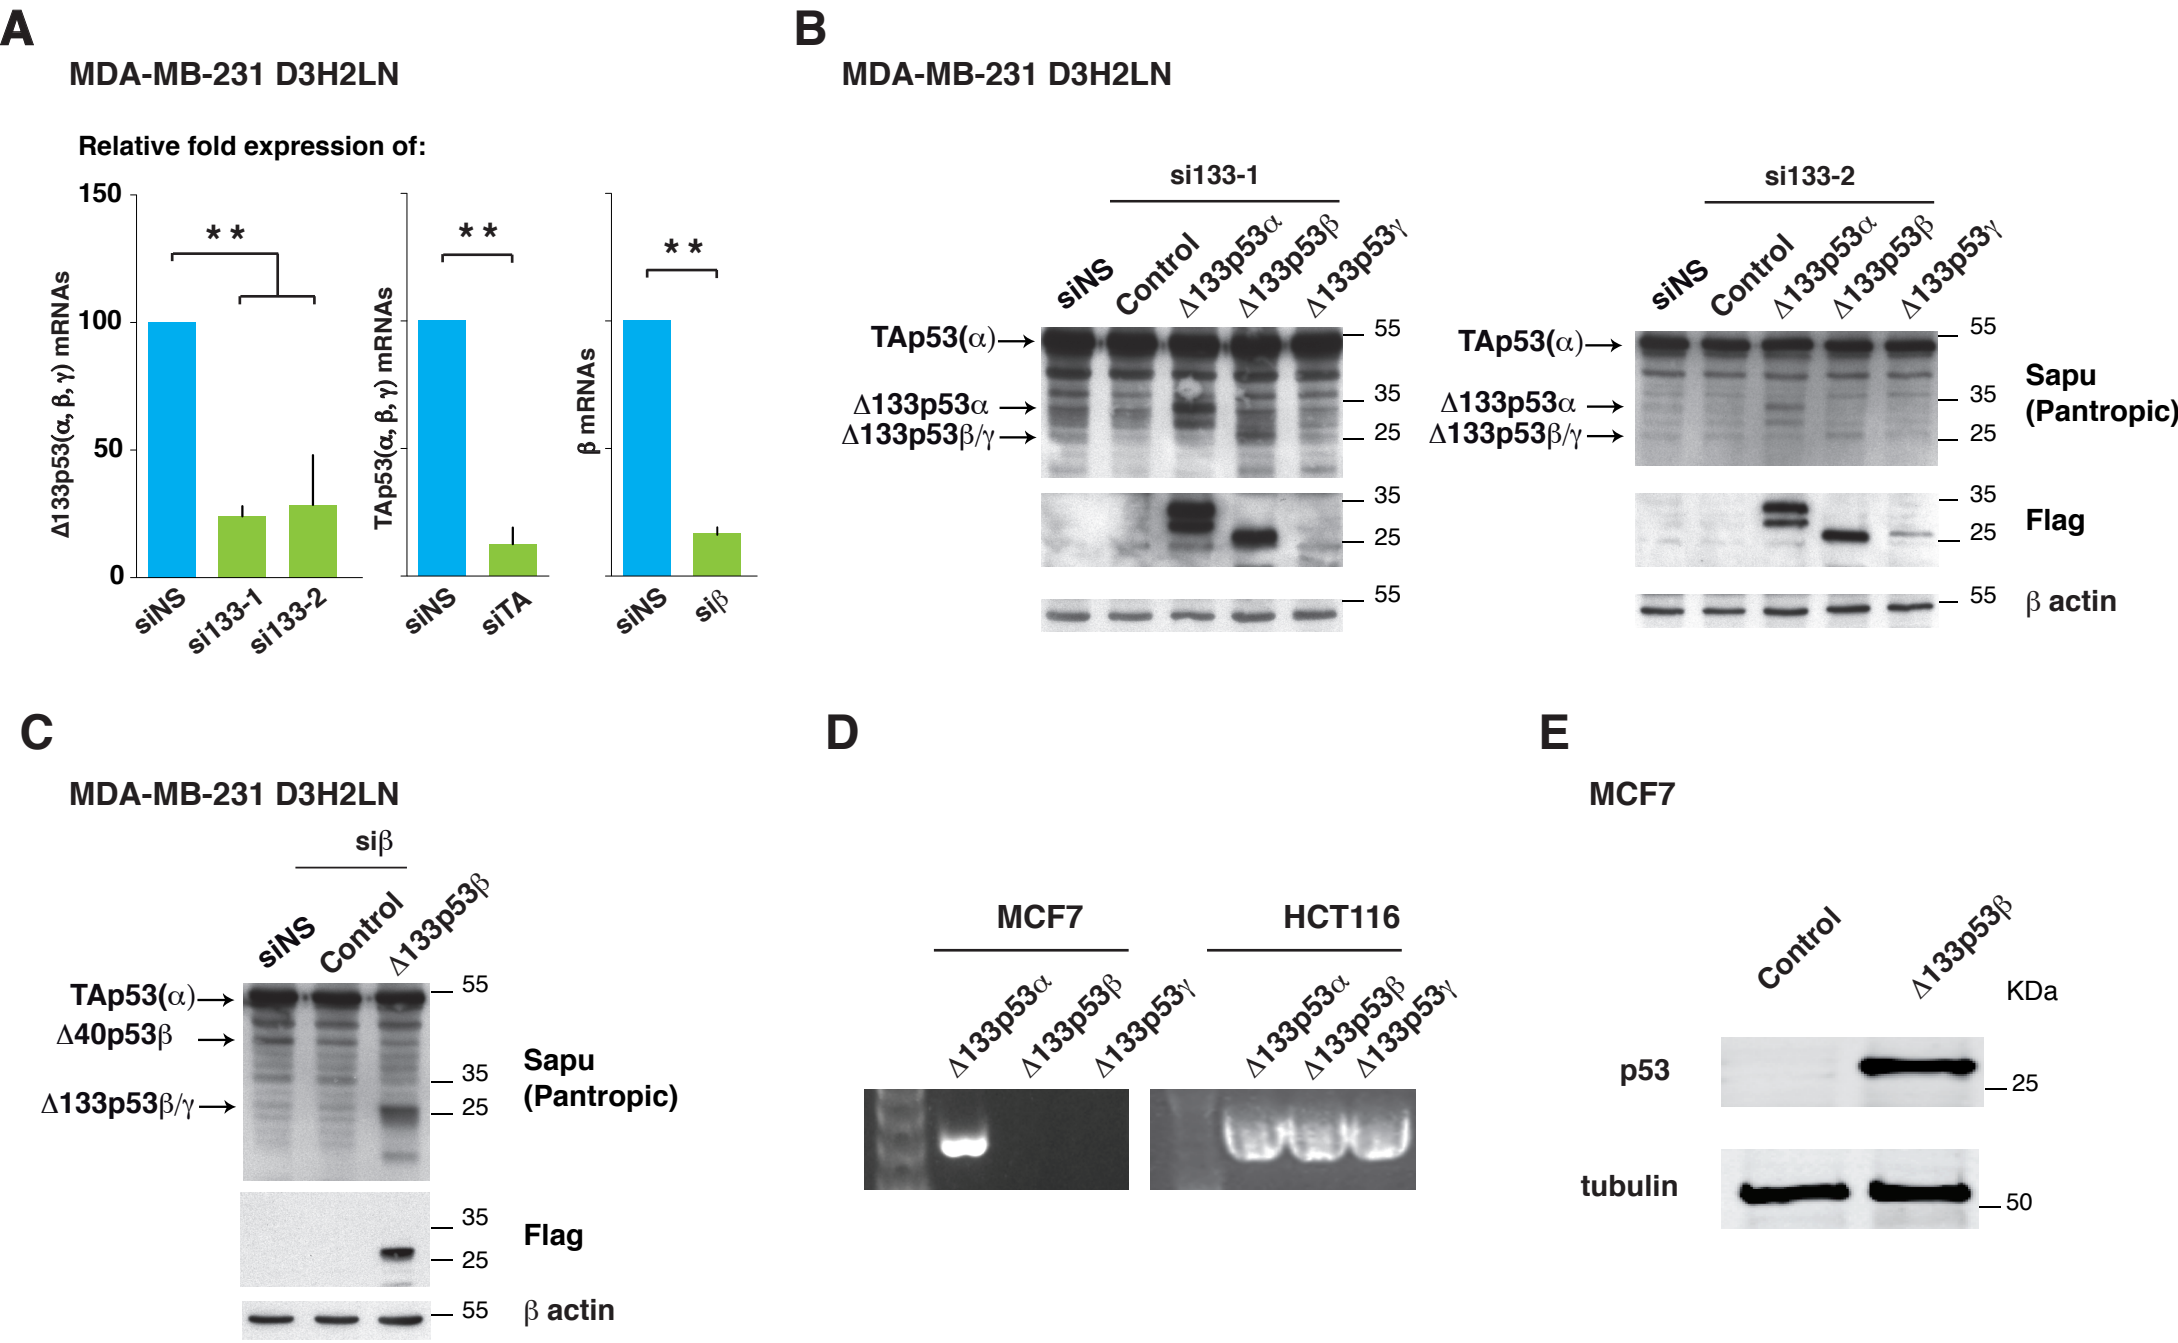

Supplement: supp [file elife-14734-supp-v1.zip]

# Figure 5-figure supplement 1

**A**

HCT116

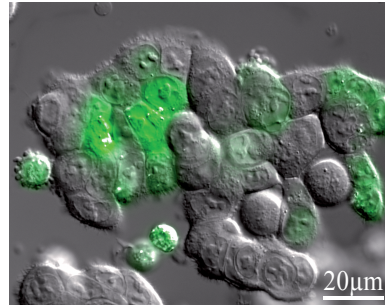

GFP

**B**

HCT116

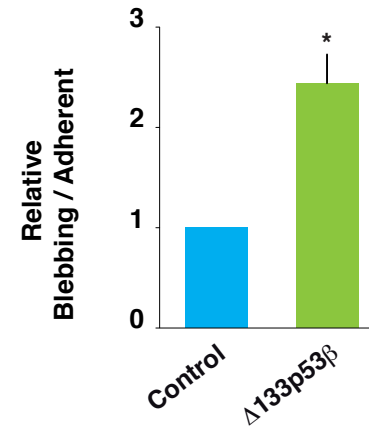

**C**

LoVo

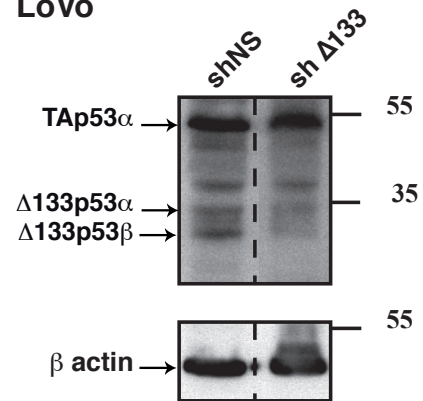

Supplement: supp [file elife-14734-supp-v1.zip]
